# Supplementary material
Source: HighWire-hosted journal article supplement (http://ajnr-stage2.highwire.org/highwire/filestream/104042/field_highwire_adjunct_files/0/0150.pdf)
Supplement: 0150.pdf [file 0150.pdf]

## Online Supplemental Data

**Supplemental Table 1:** Rubric for composite scoring model

| Each imaging feature                                | Score assignment   |                                   |
|-----------------------------------------------------|--------------------|-----------------------------------|
| Lesion center                                       | Mandibular condyle | Joint space                       |
|                                                     | 1                  | 0                                 |
| Destruction of the mandibular condyle               | Presence           | Absence                           |
|                                                     | 1                  | 0                                 |
| Destruction of the articular eminence/glenoid fossa | Absence            | Presence                          |
|                                                     | 1                  | 0                                 |
| Sclerosis of the articular eminence/glenoid fossa   | Absence            | Presence                          |
|                                                     | 1                  | 0                                 |
| Infiltration into the tendon of the LPM             | Presence           | Absence                           |
|                                                     | 1                  | 0                                 |
| Calcification                                       | Absence, stippled  | Flocculent, ring-and-arc, popcorn |
|                                                     | 1                  | 0                                 |
| Periosteal reaction                                 | Presence           | Absence                           |
|                                                     | 1                  | 0                                 |
| Internal enhancement                                | Presence           | Absence                           |
|                                                     | 1                  | 0                                 |
| Mean lesion size                                    | $\geq 30.5$ mm     | $< 30.5$ mm                       |
|                                                     | 1                  | 0                                 |

LPM: lateral pterygoid muscle.

A point of “1” indicates a high-risk feature for chondrosarcoma, while “0” indicates a favorable feature for synovial chondromatosis. A composite score for differentiating chondrosarcoma from synovial chondromatosis was created by summing the points of all variables. The best cut-off value to distinguish chondrosarcoma from synovial chondromatosis was observed for presence of  $\geq 4$  high-risk features (Youden index = 0.917, AUC = 0.986 [95% CI, 0.950–1.000]).
